# Supplementary material for: Enhanced EDC removal from water through electron beam-mediated adsorber particle integration in microfiltration membranes
Source: Royal Society of Chemistry journal article supplement (doi:10.1039/d3ra06345c), 2023-01-01
Supplement: d3ra06345c3.pdf [file d3ra06345c3.pdf]

## Enhanced EDC Removal from Water through Electron Beam-Mediated Adsorber Particle Integration in Microfiltration Membranes

Zahra Niavarani,<sup>a</sup> Daniel Breite,<sup>a</sup> Berfu Ulutaş,<sup>a,b</sup> Andrea Prager,<sup>a</sup> Ömer Kantoğlu,<sup>c</sup> Bernd Abel,<sup>d</sup> Roger Gläser<sup>d</sup> and Agnes Schulze<sup>a\*</sup>

<sup>a</sup> Leibniz Institute of Surface Engineering e.V. (IOM), Permoserstrasse 15, 04318 Leipzig, Germany

<sup>b</sup> Department of Chemistry, Middle East Technical University, 06800 Ankara, Turkey

<sup>c</sup> TENMAK, Nuclear Energy Research Institute, Kahramankazan, 06980 Ankara, Turkey

<sup>d</sup> Institute of Chemical Technology, Universität Leipzig, Linnéstraße 3, 04103 Leipzig, Germany

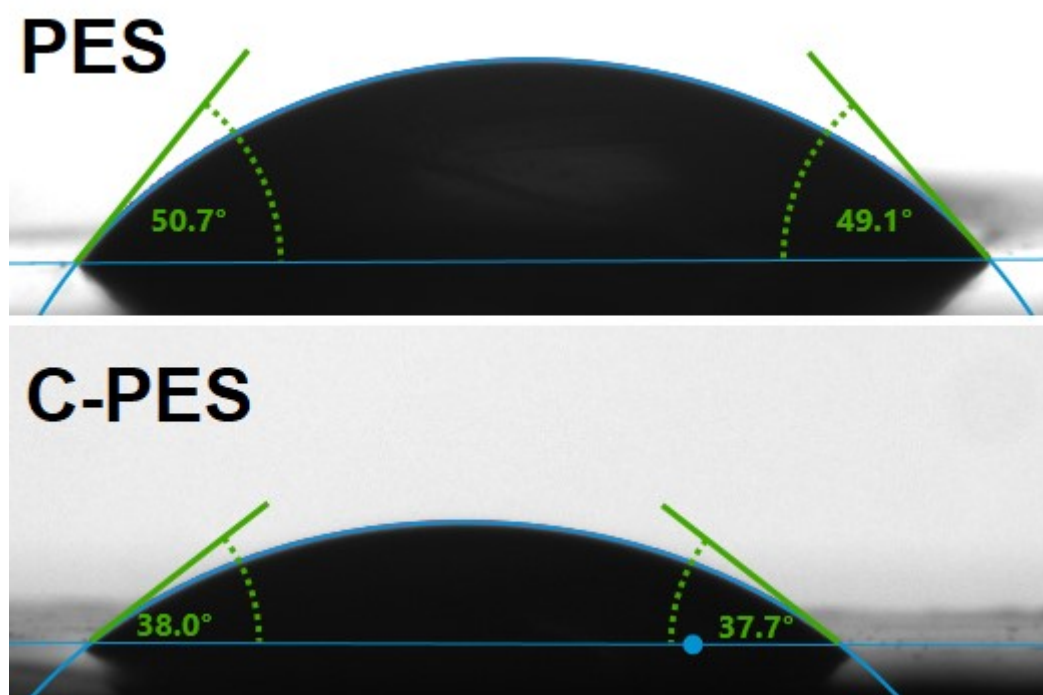

Figure 1s. Optical image of the water contact angle analysis of the reference PES and composite PES membranes.

Table 1s. Tap water composition provided by the city of Leipzig's report.

|           | Mg/L  |
|-----------|-------|
| Calcium   | 83    |
| Chloride  | 49    |
| Iron      | 0.021 |
| Potassium | 5.6   |
| Magnesium | 16    |
|           |       |
| TOC       | 2     |
