# Supplementary figures and images for: Enhanced EDC removal from water through electron beam-mediated adsorber particle integration in microfiltration membranes
Source: Royal Society of Chemistry journal article supplement (doi:10.1039/d3ra06345c), 2023-01-01

**PES**

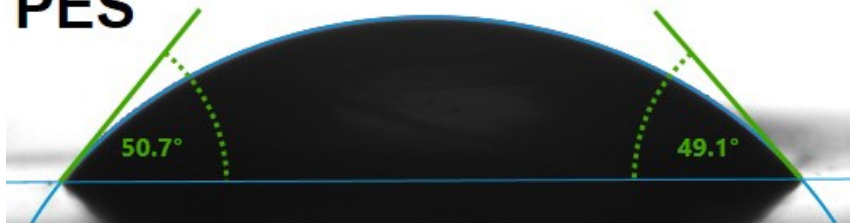

**C-PES**

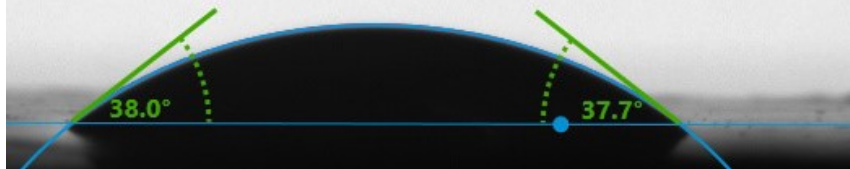

Supplement: d3ra06345c2.pdf [file d3ra06345c2.pdf]
